# Supplementary material for: Consistent Metagenome-Derived Metrics Verify and Delineate Bacterial Species Boundaries
Source: PubMed Central journal article supplement (PMC6967389; doi:10.1128/msystems.00731-19), 2020-01-14

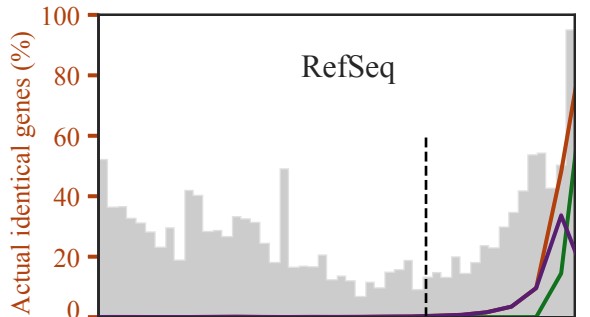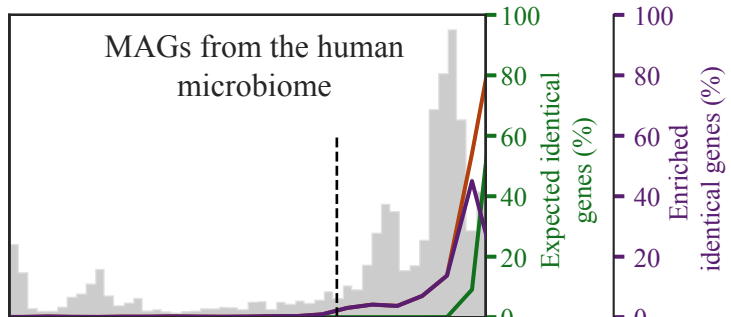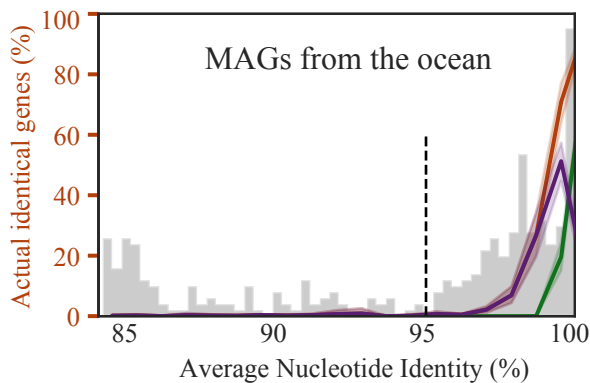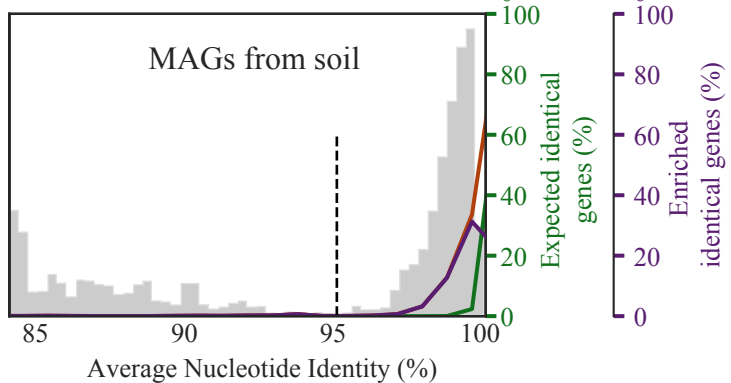

Supplement: mSystems.00731-19-sf001.pdf [file mSystems.00731-19-sf001.pdf]
